# Supplementary material for: Lacticaseibacillus rhamnosus-Derived Exopolysaccharide Attenuates D-Galactose-Induced Oxidative Stress and Inflammatory Brain Injury and Modulates Gut Microbiota in a Mouse Model
Source: MDPI journal article supplement (doi:10.3390/microorganisms10102046), 2022-10-17

**Figure S1.** Effects of EPSRam12 on  $\beta$ -diversity in the gut microbiota beta-diversity. (A) Principal coordinate plot based on weighted UniFrac distance. (B) Principal coordinate plot based on unweighted UniFrac distance.

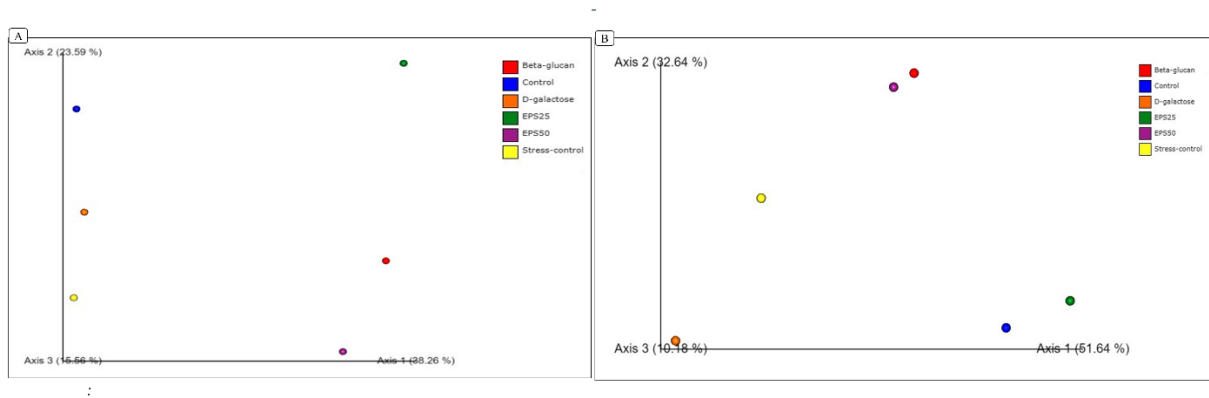

Supplement: s1 [file s1]
